# Supplementary material for: Simultaneous power generation and CO2valorization by aqueous Al–CO2batteries using nanostructured Bi2S3as the cathode electrocatalyst
Source: Royal Society of Chemistry journal article supplement (doi:10.1039/d0ta03761c), 2020-01-01
Supplement: d0ta03761c1.pdf [file d0ta03761c1.pdf]

## **Supporting Information**

### **Simultaneous Power Generation and CO<sub>2</sub> Valorization by Aqueous Al-CO<sub>2</sub> Batteries Using Nanostructured Bi<sub>2</sub>S<sub>3</sub> as the Cathode Electrocatalyst**

*Pan Ding,<sup>†</sup> Jie Zhang,<sup>†</sup> Na Han, Yuan Zhou, Lin Jia, and Yanguang Li\**

Institute of Functional Nano and Soft Materials (FUNSOM), Jiangsu Key Laboratory for Carbon-Based Functional Materials and Devices, Soochow University, Suzhou 215123, China.

<sup>†</sup>These two authors contributed equally

Email: [yanguang@suda.edu.cn](mailto:yanguang@suda.edu.cn)

---

## Experimental section

**Preparation of  $\text{Bi}_2\text{S}_3$  nanoplatelets:**  $\text{Bi}_2\text{S}_3$  NPs were prepared via a facile solvothermal method. In brief, 75 mg of bismuth acetate ( $\text{Bi}(\text{CH}_3\text{COO})_3$ , 99.99%, J&K Chemical) was firstly dissolved in 30 mL of ethylene glycol (99 %, J&K Chemical) contained in a 50 mL three-necked flask with the assistance of >30 min bath sonication. The solution was purged with  $\text{N}_2$  and gradually heated to 200 °C. At this temperature, 25 mg of solid thiourea (99.0 %, Aladdin) was rapidly added to the reaction solution. It was further reacted at 200 °C for another 5 min. After cooling down to room temperature, the solid product was collected by centrifugation, sequentially washed with ethanol and water, and finally lyophilized.

**Material characterizations:** SEM imaging was performed on a Zeiss G500 scanning electron microscope. TEM imaging was conducted on a FEI Tecnai F20 transmission electron microscope at an accelerate voltage of 200 kV. XRD pattern was collected on a PANalytical X-ray diffractometer using  $\text{Cu K}\alpha$  radiation. XPS analysis was carried out on an SSI S-Probe X-ray photoelectron spectrometer.

**Electrochemical  $\text{CO}_2\text{RR}$  measurements:** The catalyst ink was first prepared by dispersing 1 mg of  $\text{Bi}_2\text{S}_3$  NPs and 0.5 mg of Ketjen black in 250  $\mu\text{L}$  of ethanol, 30  $\mu\text{L}$  of water and 10  $\mu\text{L}$  of 5 wt% Nafion solution under the assistance of ultra-sonication for >30 min. It was then uniformly drop-cast onto a Teflon-treated carbon fiber paper (AvCarb P75T from Fuelcellstore) to achieve a catalyst loading of 1  $\text{mg cm}^{-2}$ . Electrochemical  $\text{CO}_2\text{RR}$  was carried out in a custom-built flow cell reactor as described in our previous publication (*Nat. Commun.* **2019**, *10*, 2807) using  $\text{Bi}_2\text{S}_3$ -loaded GDL as the working electrode,  $\text{Ag}/\text{AgCl}$  as the reference electrode and an Ir-coated Ti plate as the counter electrode. The volume of cathodic and anodic compartments was  $\sim 6.5 \text{ cm}^3$  each. They were separated by an anion exchange membrane (Sustainion from Dioxide Materials). The electrolyte was 1 M KOH solution. During  $\text{CO}_2\text{RR}$  measurements,  $\text{CO}_2$  gas was continuously fed to the backside of the working electrode

---

at 70 sccm. The catholyte was circulated at 5 sccm driven by a peristaltic pump. Polarization curves were collected at a scan rate of 10 mV s<sup>-1</sup> at 90% iR compensation. All potential readings were measured against Ag/AgCl and converted to RHE. The amount of formate in the catholyte was quantified using an ion chromatograph (IC, Dionex ICS-600) as described in our previous publication (*Nat. Commun.* **2018**, *9*, 1320).

***Aqueous Al-CO<sub>2</sub> batteries:*** To assemble aqueous Al-CO<sub>2</sub> batteries, Bi<sub>2</sub>S<sub>3</sub>-loaded GDL was paired with either a commercial Al foil (40 × 40 mm<sup>2</sup>, 0.2 mm thick, 99.999%) or a piece of Al sheet cut from used Al beverage cans in the same flow-cell configuration. The electrolyte was 1 M KOH and was forced to circulate at 10 sccm throughout the cathodic and anodic compartments. Discharging curves were collected at a scan rate of 10 mV s<sup>-1</sup>. Chronoamperometric tests were conducted at different discharge voltages. The amount of produced formate in the catholyte was determined by the ion chromatograph.

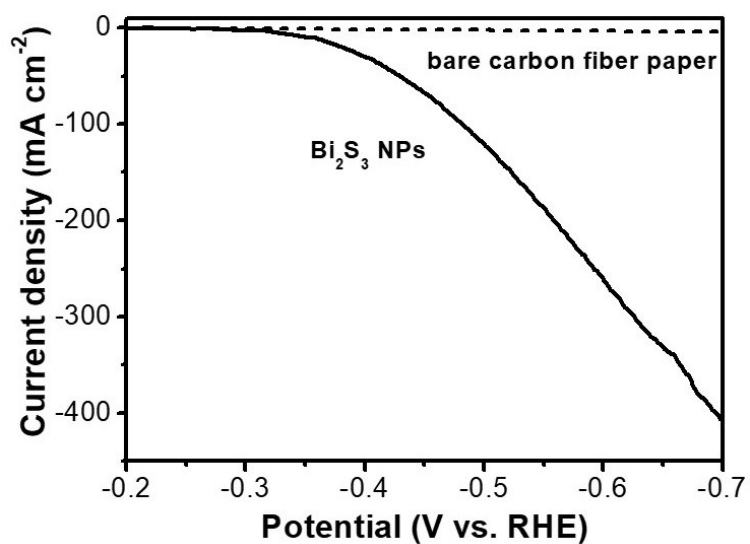

**Figure S1.** Polarization curves of bare carbon fiber paper and Bi<sub>2</sub>S<sub>3</sub>-loaded carbon fiber paper electrodes under CO<sub>2</sub> in 1 M KOH using a three-electrode flow-cell configuration.

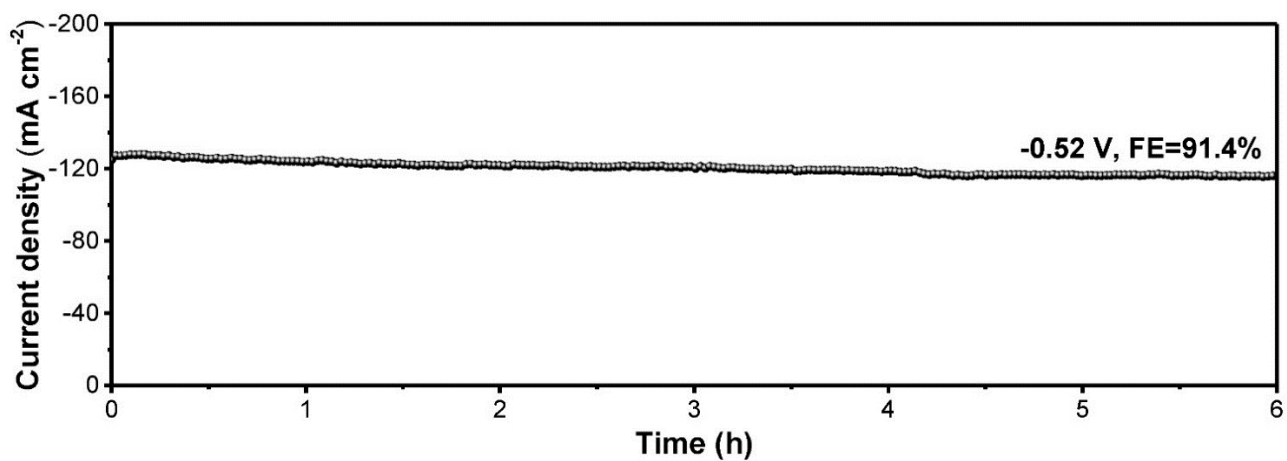

**Figure S2.** Chronoamperometric response of Bi<sub>2</sub>S<sub>3</sub> NPs at -0.52 V versus RHE under CO<sub>2</sub> in 1 M KOH using a three-electrode flow-cell configuration.
